## Intraspecific variability in maternal age effects

1 **Title:** Maternal age effects on offspring lifespan and reproduction vary within a species

2 **Authors:** Alyssa Liguori<sup>1</sup>, Sovannarith Korm<sup>1</sup>, Alex Profetto<sup>1,2</sup>, Emily Richters<sup>1,3</sup>, Kristin E.

3 Gribble<sup>1</sup>

4 <sup>1</sup> Josephine Bay Paul Center for Comparative Molecular Biology and Evolution, Marine Biological

5 Laboratory, Woods Hole, MA 02543

6 <sup>2</sup> Translational Genomics Laboratory, McLean Hospital, Belmont, MA 02478

7 <sup>3</sup> Taub Institute for Research on Alzheimer's Disease and the Aging Brain, Columbia University,

8 New York, NY 10032

9

10 Corresponding authors: Alyssa Liguori and Kristin Gribble

11 Email: [aliguori@mbi.edu](mailto:aliguori@mbi.edu), [kgribble@mbi.edu](mailto:kgribble@mbi.edu)

12

13 **Key words:**

14 rotifers, maternal effects, aging, life history, intergenerational inheritance, Lansing Effect

15

16

## Intraspecific variability in maternal age effects

### 17 **ABSTRACT**

18           Across diverse taxa, offspring from older mothers have decreased lifespan and fitness.  
19 Little is known about whether such maternal age effects vary among genotypes for a given  
20 species, however. We compared maternal age effects among four strains of rotifers in the  
21 *Brachionus plicatilis* species complex. For each strain, we measured lifespan, reproductive  
22 schedule, and lifetime reproductive output of offspring produced by young, middle-aged, and  
23 old mothers. We found unexpected variability among strains in the magnitude and direction of  
24 maternal age effects on offspring life history traits. In one strain, offspring of young mothers  
25 lived 20% longer than offspring of old mothers, whereas there were no significant effects of  
26 maternal age on lifespan for the other strains. Across strains, advanced maternal age had  
27 positive effects, negative effects, or no effect on lifetime reproductive output. For all but one  
28 strain, older mothers produced offspring that had higher maximum daily reproduction early in  
29 life. Maternal age effects appear to be genetically determined traits, not features of life history  
30 strategy or due to accumulation of age-related damage in the germline. Investigating  
31 intraspecific variability is critical for understanding the ubiquity of maternal age effects and  
32 their role in the evolution of life history and aging.

33

## Intraspecific variability in maternal age effects

### 34 **1. Introduction**

35           Maternal age effects, in which a mother’s age at the time of reproduction influences the  
36 phenotype of her offspring absent of any changes in genotype, are a common form of  
37 intergenerational plasticity. In many taxa, offspring from older mothers have decreased  
38 lifespan, fecundity, and health [1–6]. As one of the earliest experimental studies of maternal  
39 age effects was conducted by Albert Lansing using the rotifer *Philodina citrina* [3,7], a decrease  
40 in lifespan and fecundity in old-mother offspring is often referred to as a “Lansing Effect.” In  
41 other species, however, advanced maternal age has positive effects [8–10] or no effects [11] on  
42 offspring fitness. While many studies have described maternal age effects, it is unclear how  
43 they are distributed across species and whether the tendency to have positive, neutral, or  
44 negative maternal age effects is clade-specific. A recent meta-analysis of 97 animal species has  
45 shown that Lepidopterans, other invertebrates (including *C. elegans*, rotifers, copepods,  
46 annelids, snails, and fruit flies), wild (non-agricultural) mammals, and humans exhibited  
47 significant negative effects of advanced maternal age, whereas wild birds had positive maternal  
48 age effects on the early development of offspring [12].

49           The causes of maternal age effects are not clear, but are frequently thought to involve  
50 age-related shifts in trade-offs between lifespan and reproduction. If more resources are  
51 allocated to higher reproduction, then fewer resources can be allocated to somatic  
52 maintenance, repair, and growth, which could result in decreased lifespan, or vice versa [13–  
53 16]. For example, if offspring from older mothers receive fewer maternally-provisioned lipids,  
54 gene transcripts, organelles, metabolites, or other resources, they may be shorter-lived or have  
55 altered developmental and reproductive schedules. Changes in early life reproductive schedule

## Intraspecific variability in maternal age effects

56 are thought to impact late-life reproduction or schedule and lifespan [14,17]. Negative  
57 maternal age effects are hypothesized to be caused by age-related declines in the reproductive  
58 system or gamete quality, or by other physiological constraints as mothers age [3,18]. Positive  
59 maternal age effects could occur in organisms with life histories, morphologies, or physiologies  
60 that enable parents to allocate more resources to offspring later in life (e.g., if older parents are  
61 larger or more experienced) [10,12]. Both positive and negative maternal age effects could be  
62 the result of life history adaptations, such as shifting of reproductive schedules, that optimize  
63 population fitness across generations in response to environmental changes [18]. However,  
64 there is limited evidence to support these hypotheses. With the currently available studies, it is  
65 difficult to disentangle the effects of phylogeny, life history, and environment on maternal age  
66 effects among broad taxonomic groups [12].

67 To address questions about the evolution of life history and the impact of maternal age  
68 effects on population dynamics, it will be critical to understand the evolutionary mechanisms  
69 underlying intergenerational plasticity. A promising avenue of investigation is to characterize  
70 intraspecific variability in maternal age effects. Analyses among species are limited by multiple  
71 confounding variables, but within species we can compare populations or strains with relatively  
72 similar genetics, morphology, life history strategies, and environments, but distinct vital rates.  
73 Studies of *Daphnia* [19,20], *Drosophila* [4,11,21,22], and other insects [23] provide examples of  
74 high variability in the magnitude and direction of parental age effects on lifespan, development,  
75 fecundity, or embryonic diapause among strains and populations. To understand whether  
76 intraspecific variability in maternal age effects is typical, additional experimental studies of  
77 other clades are needed.

## Intraspecific variability in maternal age effects

78            Monogonont rotifers are an ideal study system for investigating phenotypic plasticity  
79 across generations. They are microscopic invertebrate animals that are abundant worldwide  
80 and play critical roles in many aquatic food webs as primary consumers and prey. Rotifers in the  
81 *Brachionus plicatilis* cryptic species complex have lifespans from 1 – 4 weeks and are easily  
82 reared across multiple, age-synchronized generations in the laboratory [24,25]. *Brachionus* spp.  
83 are cyclical parthenogens: they reproduce asexually, but in response to environmental cues  
84 (dense populations) can switch to a sexual reproduction phase that results in the formation of  
85 resting eggs [26]. Therefore, genetic diversity of populations can be manipulated, resulting in  
86 experimental cohorts that are isogenic, inbred, or genetically diverse. Phenotypic plasticity and  
87 maternal effects in response to inter- and intra-specific interactions, including inducible  
88 defenses and the induction of sexual reproduction, have been studied in these rotifers for  
89 decades [27,28]. Unlike many short-lived invertebrates, *Brachionus* females do not produce  
90 large numbers of small offspring in broods, but instead make a large reproductive investment in  
91 each offspring, producing 1-6 large neonates each day throughout the reproductive period,  
92 with a lifetime reproductive output of 20-30 offspring. This makes it an interesting species in  
93 which to examine the conservation of maternal age effects among strains. *Brachionus* has  
94 externally brooded embryos, direct development with no larval stages, and no parental care  
95 after neonates hatch, so we can distinguish the effects of metamorphoses and maternal care  
96 from other maternal age-related differences in maternal provisioning [24,25].

97            Maternal age effects are just beginning to be explored in *Brachionus* rotifers. Recent  
98 studies on the Russian strain of *B. manjavacas* (BmanRUS), have found that advanced maternal  
99 age leads to decreased lifespan and lifetime fecundity in offspring [1,29]. While large

## Intraspecific variability in maternal age effects

100 differences in lifespan and reproductive plasticity between closely-related *Brachionus* strains in  
101 response to environmental stressors have been found [30,31], the variability in maternal age  
102 effects among *Brachionus* strains is unknown.

103         Here, we tested for differences in maternal age effects on offspring lifespan and  
104 reproduction among four strains from the *Brachionus plicatilis* species complex. We compared  
105 one strain of *B. plicatilis* (BpL1) and three strains of *B. manjavacas*: BmanL5 and BmanRUS (both  
106 maintained in constant culture for > 20 years) and BmanRUS-RE, which was newly hatched from  
107 five-year-old resting (diapausing) eggs of BmanRUS. We compared BmanRUS and BmanRUS-RE  
108 to test whether the life history phenotypes that have been observed in past studies were  
109 preserved in the diapausing strain (BmanRUS-RE), which had not been subjected to laboratory  
110 selective pressures for the past five years [30,31].

111         Despite their genetic similarity, these strains differ in their origins, time in culture, vital  
112 rates under control laboratory conditions, and responses to environmental stressors [32,33].  
113 Under control conditions (21°C, *ad libitum* food), median lifespan ranged from 10 d for BpL1 to  
114 23.5 d for BmanL5. At lower temperatures (16°C), lifespans of BmanRUS and BmanL5 were  
115 extended, but the mean lifespan of BpL1 was unaffected [30]. BmanRUS has the highest  
116 tendency for mixis (sexual reproduction), BmanL5 has less, and the BpL1 strain is completely  
117 amictic (asexual). Under chronic caloric restriction and intermittent fasting diets, BmanRUS  
118 lifespan was significantly extended, but BmanL5 and BpL1 had no change in lifespan [31]. Given  
119 the substantial differences in lifespan, reproduction, and responses to environment between  
120 these strains of the same and closely related species, we wanted to know if they also differ in  
121 the effect of maternal age on offspring phenotype.

## Intraspecific variability in maternal age effects

122           In this study, we conducted multi-generation life table experiments to quantify  
123 survivorship, lifetime reproductive output, and reproductive schedules for multiple maternal  
124 age cohorts for each strain. Since BpL1 is the most distantly related strain with the most  
125 disparate vital rates and responses to environmental conditions, we expected that it would  
126 have different maternal age effects from the other strains. While BmanRUS and BmanRUS-RE  
127 are the most closely related, we hypothesized that the BmanRUS line has undergone laboratory  
128 evolution, and therefore could have distinct phenotypes from the BmanRUS-RE strain. With  
129 these life table data, we tested for trade-offs between lifespan and reproduction and whether  
130 relationships between these factors differed among strains and maternal age cohorts. Although  
131 previous work on BmanRUS did not find evidence for maternal age-related lifespan-  
132 reproduction trade-offs [1,29], we wanted to test whether trade-offs were lacking across the  
133 genetically distinct strains studied here. This work will inform future research on the evolution  
134 of variability in maternal age effects within and across clades.

## 135 **2. Materials & Methods**

### 136 **(a) Rotifer and phytoplankton culture**

137           Each rotifer strain was kept in serial culture and fed the chlorophyte algae *Tetraselmis*  
138 *suecica*. Algae cultures were maintained in 2 L flasks of bubbled f/2 medium [34], minus silica,  
139 made with 15 ppt Instant Ocean Sea Salt (Instant Ocean, Blacksburg, VA) in distilled water. Both  
140 rotifer and algae cultures were grown at 21°C on a 12:12 h light:dark cycle. Cultures of *T.*  
141 *suecica* were maintained in semi-continuous log phase growth by the removal of 40% of the  
142 culture and replacement with f/2 medium every other day throughout the experiments.

### 143 **(b) Life table experiments**

## Intraspecific variability in maternal age effects

144           The BmanRUS experiment took place in March 2021. The other three strains were  
145 studied simultaneously in July 2021. The same methods were used for all experiments. To  
146 control for maternal and grandmaternal ages of the experimental animals, two generations of  
147 maternal age synchronization were conducted before the initiation of life table experiments.  
148 Amictic eggs were removed from mature females by vortexing, isolated by micropipette, and  
149 allowed to hatch and mature for 5 days in *ad libitum* food conditions, at which time eggs were  
150 again collected from mature females. After repeating this for two generations, eggs were  
151 collected and allowed to hatch for 6 h to initiate the experimental cohort. Thus, the mothers  
152 and grandmothers of our experimental F0 cohorts were all 3 – 5 days old.

153           To initiate and track each cohort, individual neonates were allocated to 1 mL of *T.*  
154 *suecica* at a concentration of  $6 \times 10^5$  cells mL<sup>-1</sup> in 15 ppt Instant Ocean in 24-well plates (n = 55  
155 to 75 per strain). Every 24 h, each individual was observed on a Zeiss Stemi 508 microscope,  
156 scored as alive or dead, carrying or not carrying eggs (reproductive status), and the number of  
157 offspring produced within the previous 24 h was quantified. The original female was then  
158 transferred to a new well with new seawater and *T. suecica*. Daily scoring and transfers were  
159 conducted until all individuals had died. This method produced individual-level lifespan and  
160 reproduction data.

161           To initiate the F1 generation at young (Y), middle (M), and old (O) maternal ages for  
162 each strain, one neonate per mother (hatched within the past 24 h) was pipetted into a well of  
163 a new plate with 1 mL of *T. suecica* in Instant Ocean. In some cases, multiple neonates were  
164 taken from a single mother, particularly if other mothers had no neonates on the day of  
165 collection. These F1 offspring were then tracked for their entire lifetimes in the same manner as



## Intraspecific variability in maternal age effects

166 their mothers. For BmanL5 (n = 71 - 72) and BmanRUS-RE (n = 60 - 71), experimental F1  
167 generations were initiated at maternal ages of 3 (Y), 6 (M), and 10 d (O). For BpL1, maternal  
168 ages were 3 (n = 68), 6 (n = 69), and 9 days (n = 39) because of its shorter lifespan. The F1  
169 generation of BmanRUS had only two maternal ages: young (3 d; n = 62) and old (11 d; n = 90).

### 170 **(c) Statistical analyses**

171 All data were plotted and analyzed using R v. 4.0.2 [35]. The ‘survival’ and ‘survminer’  
172 packages [36,37] were used to create Kaplan-Meier survivorship curves. Differences in  
173 survivorship curves among maternal age cohorts were tested within each strain using log-  
174 rank/Mantel-Haenszel tests implemented within the ‘survival’ package. For each strain, two  
175 separate tests were used to compare Y versus M and Y versus O cohorts (except for BmanRUS,  
176 for which there was only Y and O). The Bonferroni method was used to adjust the critical alpha  
177 value to account for multiple comparisons. Individuals were right-censored if their death was  
178 not observed due to accidental loss during daily transfers.

179 For lifetime reproductive output (LRO), maximum daily reproduction (MDR), age of 50%  
180 LRO, and reproductive period, differences among cohorts were tested within each strain using  
181 Kruskal-Wallis rank sum tests. Pairwise comparisons were made using Wilcoxon rank sum tests.  
182 To test for life history trade-offs, regression models were fit to describe the relationships  
183 between lifespan and LRO, reproductive period (in days and as a percentage of lifespan), and  
184 the age of 50% LRO. For each strain, hypothesis tests were conducted to determine whether  
185 differences among maternal age cohorts in regression constants and coefficients were  
186 statistically significant. These tests were also conducted to compare strains, after pooling  
187 maternal age cohorts within each strain.

## Intraspecific variability in maternal age effects

### 188 **3. Results**

#### 189 **(a) Survivorship:**

190 Maternal age effects on offspring lifespan differed among strains (figure 1). For BmanL5,  
191 offspring of younger mothers (Y) lived significantly longer than offspring of older mothers (O)  
192 (median lifespans of 17 and 13.5 d, respectively;  $p < 0.0001$ ). Median lifespan of offspring of  
193 middle-aged mothers (15 d) was shorter but not significantly different than that of young-  
194 mother offspring ( $p = 0.128$ ). Offspring of younger mothers also lived longer than offspring of  
195 older mothers for BmanRUS-RE, but this difference was not significant after a Bonferroni  
196 correction for multiple comparisons (median lifespans of 12.5 and 11d, respectively;  $p = 0.047$ ,  
197 Bonferroni corrected alpha = 0.025). For BmanRUS, there was no effect of maternal age on  
198 offspring lifespan ( $p = 0.259$ ); median lifespan for all cohorts was 16 days. There was also no  
199 effect of maternal age on offspring lifespan for BpL1 (Y vs. M:  $p = 0.913$ ; Y vs. O:  $p = 0.239$ ).  
200 Median lifespan for BpL1 cohorts ranged from 8-9 days, much shorter than that for the other  
201 strains. Maximum lifespan (age of 5% survivorship) was similar among cohorts for BmanRUS (Y  
202 = 21 d, O = 20 d). For BmanL5 and BmanRUS-RE, maximum lifespan was shorter in O cohorts  
203 (BmanL5: Y and M = 22 d, O = 20 d; BmanRUS-RE: Y and M = 20 d, O = 17 d). Maximum lifespan  
204 was shorter for BpL1 than for other strains across cohorts (Y = 15 d, M = 16 d, O = 14 d; figure 1,  
205 table S1).

#### 206 **(b) Reproduction:**

207 Maternal age affected offspring lifetime reproductive output (LRO) in two of four  
208 strains, but these effects were in opposing directions (figure 2). For BmanL5, offspring of  
209 younger mothers had higher LRO (mean  $\pm$  SE:  $24.8 \pm 0.33$  neonates  $\text{ind}^{-1}$ ) than did offspring of

### Intraspecific variability in maternal age effects

210 both middle-aged and older mothers (mean  $\pm$  SE:  $22.1 \pm 0.46$  and  $22.2 \pm 0.49$  neonates ind<sup>-1</sup>,  
211 respectively;  $H(3) = 57.04$ ,  $p < 0.0001$ ; figure 2G). For BpL1, LRO for all maternal age cohorts  
212 was lower than that of the other strains. Offspring of young BpL1 mothers had the lowest LRO  
213 (mean  $\pm$  SE:  $8.5 \pm 0.61$  neonates ind<sup>-1</sup>), compared to older maternal age cohorts that produced  
214 just over 10 neonates individual<sup>-1</sup> on average ( $H(3) = 9.33$ ,  $p = 0.025$ ; figure 2A). For both  
215 BmanRUS and BmanRUS-RE, there was no significant effect of maternal age on offspring LRO,  
216 although offspring from older mothers tended to have higher reproductive output than  
217 offspring from younger mothers on average (BmanRUS:  $H(2) = 2.52$ ,  $p = 0.28$ ; BmanRUS-RE:  
218  $H(3) = 8.3$ ,  $p = 0.04$ , no significant pairwise comparisons, Wilcoxon rank sum test; figure 2C and  
219 2E, table S1).

220 Variability in LRO among individuals also differed among strains and maternal age  
221 cohorts. In BpL1, ~6% of individuals were sterile, which did not occur in the other strains  
222 (variance: Y = 24.9, M = 28.9, O = 40.6). In BmanL5, variability in LRO was twice as high in M and  
223 O cohorts than in the Y cohort (variance: Y = 7.7, M = 14.6, O = 17.2), with some M and O  
224 individuals producing very few offspring (minimum LROs of Y, M, and O cohorts, respectively:  
225 16, 4, and 7 neonates ind<sup>-1</sup>). For BmanRUS-RE, the O cohort had a smaller range in LRO among  
226 individuals (17 – 34 neonates ind<sup>-1</sup>, omitting one non-reproductive individual) versus the Y and  
227 M cohorts (9 – 36 and 6 – 35 neonates ind<sup>-1</sup>; variance: Y = 58.3, M = 37.8, O = 19.2). Variability  
228 in LRO was similar between the Y and O cohorts of BmanRUS (variance: Y = 33.1, O = 27.8; table  
229 S1).

230 Reproductive schedule differed among maternal age cohorts and strains. For the O  
231 cohort of BmanL5, daily reproduction was high in early life (mean maximum daily reproduction

## Intraspecific variability in maternal age effects

232 (MDR): 4.9 neonates ind<sup>-1</sup>; H(3) = 105.4, p < 0.0001), but then declined rapidly after 6 d, until  
233 most individuals stopped producing neonates at the age of 9 d. The Y cohort had lower daily  
234 reproduction in early life (mean MDR: 4.1 neonates ind<sup>-1</sup>), but also showed a slower decline in  
235 reproduction over time. Most Y individuals produced neonates until 12 d old, which led to  
236 higher LRO than for M and O cohorts. Rotifers in the M and O cohorts reached 50% LRO one  
237 day earlier than rotifers in the Y cohort (age 5 d versus 6 d; H(3) = 156.17, p < 0.0001; figure  
238 2H). A similar pattern was observed for BmanRUS-RE, but the difference in maximum daily  
239 reproduction between O and Y cohorts was larger (mean MDR: 4.7 vs. 3.7 neonates ind<sup>-1</sup>; H(3) =  
240 116.15, p < 0.0001). This led to higher LRO in offspring of older mothers on average, despite a  
241 steep decline in reproduction that began at day eight. Offspring of young mothers produced at  
242 least one neonate per day on average through day 13. Like BmanL5, BmanRUS-RE rotifers in the  
243 O cohort reached 50% LRO earlier (age 5 d versus 6 d; H(3) = 38.2, p < 0.0001; figure 2F). For  
244 BmanRUS, early peaks in neonate production were not as high as in the other *B. manjavacas*  
245 strains. The BmanRUS O cohort peak was higher than the Y peak (mean MDR of O cohort: 3.2  
246 neonates ind<sup>-1</sup>, Y cohort: 3 neonates ind<sup>-1</sup>; H(2) = 16.97, p = 0.0002). After day 13, daily  
247 reproduction declined more rapidly in the O cohort than in the Y cohort. Rotifers in the O  
248 cohort reached 50% LRO one day earlier than Y cohort rotifers (age 7 d versus 8 d; H(2) = 33.4, p  
249 < 0.0001; figure 2D). For BpL1, the highest mean MDR (3 neonates ind<sup>-1</sup>) occurred in the M  
250 cohort (H(3) = 22.3, p < 0.0001). There were no significant differences among cohorts in age of  
251 50% LRO (median across cohorts: 4.5 d; H(2) = 1.2, p = 0.55; figure 2B, table S1).

## 252 (c) Reproductive period

## Intraspecific variability in maternal age effects

253            Reproductive period, measured as the percent of lifetime in which mothers carried eggs,  
254            was affected by maternal age in different ways among strains. For BmanL5 and BmanRUS, Y  
255            cohorts had longer reproductive periods than M (BmanL5 only) and O cohorts (BmanL5:  $H(3) =$   
256             $32.88$ ,  $p < 0.0001$ ; BmanRUS:  $H(2) = 6.04$ ,  $p = 0.049$ ). Across maternal age cohorts, BmanRUS  
257            had longer mean reproductive periods (71.9 to 75.5%) than did BmanL5 (48.8 to 58.6%). There  
258            were no significant differences in mean reproductive periods among maternal age cohorts for  
259            BmanRUS-RE, although they were longer on average for the Y cohort (73.2 to 78.6%;  $H(3) =$   
260             $6.13$ ,  $p = 0.11$ ). For BpL1, the longest reproductive periods were observed in the M cohort  
261            (mean of 65.6% versus 54.6 and 56.8% for the Y and O cohorts;  $H(3) = 7.77$ ,  $p = 0.05$ ; figure 3,  
262            table S1).

### 263            **(d) Life history trade-offs:**

264            Correlations between lifespan and four metrics of reproduction differed among strains,  
265            but there were few differences among maternal age cohorts within strains. LRO increased with  
266            lifespan across all strains, but the slope of this relationship was lowest for BmanL5 (slope of  
267             $0.39$  versus  $0.90 - 1.01$  for the other strains; figure S1A). For BmanRUS, the relationship  
268            between LRO and lifespan was similar between maternal age cohorts (constants:  $p = 0.13$ ,  
269            slopes:  $p = 0.21$ ; figure 4E). For the remaining strains, only the regression constants (not slopes)  
270            differed among maternal age cohorts (BmanL5:  $p = 0.0009$ , BmanRUS-RE:  $p < 0.0001$ , BpL1:  $p =$   
271             $0.0019$ ; figure 4A, 4I, and 4M). The length of the reproductive period ( $d$ ) also increased with  
272            lifespan across strains; BmanL5 had the lowest slope ( $0.24$  versus  $0.44 - 0.61$  for the other  
273            strains; figure S1C). For BmanL5 and BpL1, regression constants differed among maternal age  
274            cohorts (BmanL5:  $p < 0.0001$ , BpL1:  $p = 0.03$ ; figure 4O and 4C). For BmanRUS and BmanRUS-

## Intraspecific variability in maternal age effects

275 RE, the slope of the relationship between reproductive period and lifespan was steeper in the Y  
276 cohort versus the older cohorts (BmanRUS slopes:  $p = 0.009$ , BmanRUS-RE slopes:  $p = 0.02$ ;  
277 figure 4G and 4K).

278 Reproductive period as a percentage of lifespan decreased with increasing lifespan  
279 across strains, except for BpL1, for which there was no significant relationship (figure S1B). For  
280 BmanRUS and BmanRUS-RE, the negative slope of the relationship was steepest in the O  
281 cohorts versus younger cohorts (BmanRUS slopes:  $p = 0.004$ , BmanRUS-RE slopes:  $p = 0.026$ ;  
282 figure 4F and 4J). The age of 50% LRO increased with lifespan across strains, but again BmanL5  
283 had the lowest slope (0.076 versus 0.169 – 0.201 for the other strains; figure S1D). For  
284 BmanRUS-RE, the slope of this relationship was steepest in the Y cohort (slopes:  $p = 0.039$ ;  
285 figure 4L). Slopes did not differ among maternal age cohorts in the other strains (figure 4D, 4H,  
286 and 4P).

## 287 4. Discussion

288 Maternal age effects are known to vary among species, in a manner thought to be  
289 dependent on large differences in life history strategies among evolutionarily distant taxa. Here  
290 we show unexpected intraspecific differences in the magnitude and direction of maternal age  
291 effects on offspring lifespan and reproduction in *Brachionus* rotifers. Our findings suggest that  
292 maternal age effects are genetically determined traits which may differ even among closely  
293 related species with identical life history strategies. This work implies that maternal age effects  
294 are not simply caused by the age-related accumulation of cellular or DNA damage that is passed  
295 on to offspring. Alternatively, if such damage accumulation does occur, some genotypes may  
296 have the capacity to prevent or repair resulting dysfunction in the germline.

## Intraspecific variability in maternal age effects

297           Changes in lifespan and reproduction due to maternal age effects were not due to  
298 lifespan-reproduction trade-offs. BmanL5, which had the longest post-reproductive period (as a  
299 percent of the lifespan), displayed the strongest negative effects of advanced maternal age.  
300 Median lifespan of offspring of old mothers was 20% shorter than that of offspring of young  
301 mothers. Offspring of young mothers had higher lifetime reproductive output (LRO), with lower  
302 variability among individuals, and longer reproductive periods relative to offspring of old  
303 mothers.

304           BmanRUS was least affected by maternal age: both lifespan and LRO were similar  
305 between young and old mother cohorts, though advanced maternal age in BmanRUS did lead  
306 to shorter reproductive periods and the production of more neonates early in life. For  
307 BmanRUS-RE, a strain that was initiated with BmanRUS resting eggs from 2016, offspring of  
308 younger mothers had a 10% higher median lifespan (though this difference was not significant),  
309 and there was no effect of maternal age on LRO. BmanRUS-RE had the largest difference in  
310 early-life reproductive peaks between old and young mother cohorts across strains. For all *B.*  
311 *manjavacas* strains, old mother cohorts produced the majority of their offspring earlier in life  
312 than young mother cohorts. For BpL1, the most distantly-related strain with the shortest  
313 lifespan and lowest reproduction overall, advanced maternal age led to higher LRO, but had no  
314 effect on lifespan.

315           Intraspecific variability in maternal age effects has been described in only a few other  
316 species, the most well-studied of which is *Drosophila melanogaster*. A comparison of six lab  
317 strains (4 inbred and 2 outbred) showed that older mothers generally produced offspring with  
318 shorter lifespans, but in a single strain, Canton-S, advanced maternal age led to longer lifespan

## Intraspecific variability in maternal age effects

319 in offspring [22]. We did not observe increased lifespan in old-mother offspring in any rotifer  
320 strain in the current study. Lee and colleagues [21] replicated the positive effect of advanced  
321 maternal age on offspring lifespan in Canton-S, but saw negative maternal age effects in two  
322 additional strains. Bloch Qazi and colleagues [4] also studied Canton-S as well as Oregon-R and  
323 found that embryo viability (hatching success) and embryo to adult viability were lower in  
324 offspring of old mothers, even in the strain with positive effects of advanced maternal age on  
325 offspring lifespan, though the magnitude of effects differed between the strains. Three *D.*  
326 *melanogaster* populations collected from distinct environments in Turkey also showed both  
327 positive and negative effects of advanced maternal age on offspring longevity [11]. In *Daphnia*  
328 *pulex*, advanced maternal age decreased offspring lifespan in two of three clones studied, but  
329 advanced maternal age led to higher growth rates in offspring in all three clones [19]. In  
330 *Daphnia magna*, five clones showed positive, negative, and neutral maternal age effects on  
331 lifespan [20]. Such high intraspecific variability in maternal age effects within these model  
332 arthropods and rotifers demonstrates the importance of including multiple strains or  
333 populations in future studies of maternal age effects in other clades.

334         Variability in the direction and magnitude of maternal age effects between species has  
335 been attributed to differences in life history strategy that result from varied selective pressures  
336 and evolutionary constraints. Here, we have shown that strains of the same species can also  
337 exhibit divergent maternal age effects. Intraspecific differences in maternal effects could also  
338 be due to differential selective pressures in diverse environments. For example, in the striped  
339 ground cricket, *Allonemobius fasciatus*, populations that span a wide latitudinal cline face  
340 different seasonality and have evolved distinct life histories. Northern populations experiencing



## Intraspecific variability in maternal age effects

341 short growing seasons only reproduce once in a year (univoltine), while southern populations  
342 with longer growing seasons and milder winters can reproduce multiple times per year (bi- and  
343 multivoltine). In univoltine populations, maternal age has no effect on the tendency for  
344 diapause in offspring. At the end of the short growing season, mating adults produce eggs that  
345 diapause, overwinter, and hatch in the spring with sufficient time for maturation. In  
346 multivoltine populations, the tendency to produce diapausing eggs increases with maternal  
347 age, which is advantageous since the probability of producing offspring that will mature before  
348 winter decreases as the growing season progresses [23].

349         The strains studied here were originally isolated from different geographic sites [31], but  
350 all have been continuously cultured in the lab under similar serial culture methods for decades.  
351 These strains have been subjected to the same conditions of no predation, a consistent daily  
352 light:dark cycle, constant temperature, cycles of high and low food, cycles of high and low  
353 population density, and frequent population bottlenecks. Therefore, all strains have been  
354 subjected to the same selective pressures for thousands of generations. Differences in initial  
355 genetic composition at the time of culture origin, spontaneous mutation, and genetic drift  
356 caused by frequent population bottlenecks all may have contributed to the laboratory  
357 evolution of these strains, which could underlie the variation in vital rates and maternal age  
358 effects observed here.

359         BmanRUS-RE, which was initiated from resting eggs of BmanRUS collected in 2016, was  
360 included in this study to test whether maternal age effect experiment results in BmanRUS from  
361 2014 – 2018 could be replicated [1,29]. We expected that BmanRUS-RE would be genetically  
362 and phenotypically more similar to BmanRUS used in previous studies than to the current

## Intraspecific variability in maternal age effects

363 continuously cultured BmanRUS strain, potentially due to recent laboratory evolution of the  
364 BmanRUS strain. In previous BmanRUS studies, offspring of old mothers had shorter lifespans  
365 than offspring of young mothers by 10 – 25% and lower LRO by ~50% [1,29]. Here, maternal age  
366 had no effect on lifespan or LRO in BmanRUS. In BmanRUS-RE, there were also no statistically  
367 significant effects of maternal age on lifespan or LRO, but on average, offspring from younger  
368 mothers lived 1.5 days longer than offspring from old mothers. Thus, the previously observed  
369 strong negative maternal age effects in BmanRUS were not fully recovered in BmanRUS-RE.  
370 When sexually-produced resting eggs of BmanRUS were collected, stored, and later hatched, it  
371 is likely that only a small proportion of the population was randomly sampled. Therefore  
372 BmanRUS-RE may be genetically distinct from BmanRUS in both 2016 and 2021, as a result of  
373 genetic drift. Such variation within a species suggests that maternal age effects are under  
374 genetic control rather than due to a passive, age-related accumulation of damage in the  
375 germline or to universal resource trade-offs between reproduction and lifespan.

376 Life history theory predicts a trade-off between lifespan and reproduction, at least  
377 under limiting resources [38]. In the biology of aging literature, this is often interpreted to mean  
378 that increased reproduction causes shorter lifespan, or that limiting or delaying reproduction  
379 can increase longevity, and that maternal age effects are driven by such trade-offs [13–16]. For  
380 example, Plaistow and colleagues [19] attributed the negative lifespan effects of advanced  
381 maternal age to earlier reproduction by old mother offspring. In strains of *Daphnia pulex*, they  
382 found that advanced maternal age led to shorter lifespan in two of three strains studied. Across  
383 all three strains, offspring of older mothers had increased clutch sizes earlier in life and faster  
384 growth than offspring of young mothers. Only in the two strains in which lifespan was reduced

## Intraspecific variability in maternal age effects

385 in offspring of old mothers did reproductive maturation occur at larger body sizes. Thus, the  
386 authors concluded that increased early life reproduction traded-off with lifespan and that  
387 maternal age effects were a result of better offspring provisioning by older mothers. Similarly,  
388 Anderson and colleagues [20] studied multiple strains of *Daphnia magna* and found an “inverse  
389 Lansing Effect” in some strains, in which offspring of older mothers lived longer than offspring  
390 of younger mothers. They hypothesized that this inverse effect could be a result of *decreased*  
391 lipid offspring provisioning by older mothers, which could result in embryonic caloric  
392 restriction. The notion of a trade-off between lifespan and reproduction also underlies this  
393 hypothesis: decreased lipid stores during development ultimately limits reproduction and  
394 subsequently increases lifespan. Although caloric restriction is a well-documented mechanism  
395 of lifespan extension in adult animals, however, embryonic and fetal resource limitation has  
396 been shown to cause negative outcomes for offspring [39].

397 In contrast to these other studies, among the *B. manjavacas* strains examined here,  
398 earlier or higher reproduction were not uniformly correlated with shorter lifespan. Old-mother  
399 cohorts of all three strains produced 50% of their LRO one day earlier, and early life maximum  
400 daily reproduction was higher than in young-mother cohorts. BmanRUS-RE had the largest  
401 difference between maternal age cohorts in early life reproductive peaks, and BmanRUS had  
402 the smallest, but still significant, difference. However, significantly shorter lifespans in the old  
403 mother cohort were only observed for BmanL5. Thus, this study does not provide evidence that  
404 a trade-off between increased early life reproduction and lifespan drives maternal age effects.  
405 Additionally, the effects of maternal age, either positive or negative, could not be explained by  
406 trade-offs between reproduction and longevity among the strains. This suggests that trade-offs

## Intraspecific variability in maternal age effects

407 between somatic maintenance and development time or reproductive output are not primary  
408 drivers of lifespan, at least under replete food conditions. This additionally emphasizes the  
409 importance of comparing multiple strains before drawing conclusions about the ubiquity of  
410 mechanisms controlling life history strategy. Indeed, if we had tested maternal age effects in  
411 only BmanL5, in which offspring of older mothers had both shorter lifespans and earlier peaks  
412 in reproduction, we might conclude that maternal age effects are driven by life history trade-  
413 offs, in a similar manner as the *Daphnia* studies. Conversely, if BmanRUS had been the sole  
414 experimental strain, we might eliminate trade-offs between reproduction and lifespan as a  
415 potential mechanism, as reproductive timing was affected by maternal age, but lifespan was  
416 not.

417         Maternal age effects on offspring lifespan and reproduction are genotype-specific in  
418 *Brachionus* rotifers. Resource trade-offs between lifespan and reproduction likely do not  
419 underlie the variable effects observed here. More studies examining intraspecific variability in  
420 maternal age effects are needed to determine whether such high variation is widespread  
421 among clades or specific to arthropods and rotifers (the most well-studied taxa to date). Future  
422 work on maternal age effects in rotifers and other species should include more genotypes,  
423 ideally spanning diverse life history strategies. For example, comparing multiple strains with a  
424 range of tendencies for mixis and varied vital rates could allow for direct tests of the influence  
425 of life history traits on maternal age effects. Future quantitative trait locus (QTL) analyses or  
426 comparative genomics studies of strains with varied maternal age effects may provide insight  
427 into the genetic controls of intergenerational inheritance.

428

## Intraspecific variability in maternal age effects

429 **Acknowledgements and funding:** This work was funded by NSF CAREER Award IOS-1942606

430 and by NIA R01AG076592 to K. Gribble.

431 **Data availability:** Scripts and raw data are available online:

432 [https://github.com/aliguori19/Brachionus\\_intraspecific\\_variation](https://github.com/aliguori19/Brachionus_intraspecific_variation)

433

## Intraspecific variability in maternal age effects

### 434 References

- 435 1. Bock MJ, Jarvis GC, Corey EL, Stone EE, Gribble KE. 2019 Maternal age alters offspring  
436 lifespan, fitness, and lifespan extension under caloric restriction. *Sci. Rep.* **9**, 3138.  
437 (doi:10.1038/s41598-019-40011-z)
- 438 2. Barclay K, Myrskylä M. 2016 Maternal age and offspring health and health behaviours in  
439 late adolescence in Sweden. *SSM - Popul. Health* **2**, 68–76.  
440 (doi:10.1016/j.ssmph.2016.02.012)
- 441 3. Lansing AI. 1947 A transmissible, cumulative, and reversible factor in aging. *J. Gerontol.* **2**,  
442 228–239. (doi:10.1093/geronj/2.3.228)
- 443 4. Bloch Qazi MC, Miller PB, Poeschel PM, Phan MH, Thayer JL, Medrano CL. 2017  
444 Transgenerational effects of maternal and grandmaternal age on offspring viability and  
445 performance in *Drosophila melanogaster*. *J. Insect Physiol.* **100**, 43–52.  
446 (doi:10.1016/j.jinsphys.2017.05.007)
- 447 5. Beamonte-Barrientos R, Velando A, Drummond H, Torres R. 2010 Senescence of maternal  
448 effects: aging influences egg quality and rearing capacities of a long-lived bird. *Am. Nat.*  
449 **175**, 469–480. (doi:10.1086/650726)
- 450 6. Fox CW, Bush ML, Wallin WG. 2003 Maternal age affects offspring lifespan of the seed  
451 beetle, *Callosobruchus maculatus*. *Funct. Ecol.* **17**, 811–820. (doi:10.1111/j.1365-  
452 2435.2003.00799.x)
- 453 7. Lansing AI. 1954 A nongenetic factor in the longevity of rotifers. *Ann. N. Y. Acad. Sci.* **57**, 455–  
454 464. (doi:10.1111/j.1749-6632.1954.tb36418.x)
- 455 8. Krishna MS, Santhosh HT, Hegde SN. 2012 Offspring of older males are superior in  
456 *Drosophila bipectinata*. *Zool. Stud.* **51**, 72–84.
- 457 9. Perez MF, Francesconi M, Hidalgo-Carcedo C, Lehner B. 2017 Maternal age generates  
458 phenotypic variation in *Caenorhabditis elegans*. *Nature* **552**, 106–109.  
459 (doi:10.1038/nature25012)
- 460 10. Travers LM, Carlsson H, Lind MI, Maklakov AA. 2021 Beneficial cumulative effects of old  
461 parental age on offspring fitness. *Proc. R. Soc. B Biol. Sci.* **288**, 20211843.  
462 (doi:10.1098/rspb.2021.1843)
- 463 11. Yilmaz M, Özsoy ED, Bozcuk AN. 2008 Maternal age effects on longevity in *Drosophila*  
464 *melanogaster* populations of different origin. *Biogerontology* **9**, 163–168.  
465 (doi:10.1007/s10522-008-9125-y)
- 466 12. Ivimey-Cook E, Moorad J. 2020 The diversity of maternal-age effects upon pre-adult survival  
467 across animal species. *Proc. R. Soc. B Biol. Sci.* **287**, 20200972. (doi:10.1098/rspb.2020.0972)

## Intraspecific variability in maternal age effects

- 468 13. Stearns SC. 1989 Trade-offs in life-history evolution. *Funct. Ecol.* **3**, 259–268.  
469 (doi:10.2307/2389364)
- 470 14. Stearns SC. 1976 Life-history tactics: a review of the ideas. *Q. Rev. Biol.* **51**, 3–47.  
471 (doi:10.1086/409052)
- 472 15. Kirkwood TBL. 1977 Evolution of ageing. *Nature* **270**, 301–304. (doi:10.1038/270301a0)
- 473 16. Kirkwood TBL, Holliday R, Maynard Smith J, Holliday R. 1979 The evolution of ageing and  
474 longevity. *Proc. R. Soc. Lond. B Biol. Sci.* **205**, 531–546. (doi:10.1098/rspb.1979.0083)
- 475 17. Williams GC. 1957 Pleiotropy, natural selection, and the evolution of senescence. *Evolution*  
476 **11**, 398–411. (doi:10.2307/2406060)
- 477 18. Monaghan P, Maklakov AA, Metcalfe NB. 2020 Intergenerational transfer of ageing:  
478 parental age and offspring lifespan. *Trends Ecol. Evol.* **35**, 927–937.  
479 (doi:10.1016/j.tree.2020.07.005)
- 480 19. Plaistow SJ, Shirley C, Collin H, Cornell SJ, Harney ED. 2015 Offspring provisioning explains  
481 clone-specific maternal age effects on life history and life span in the water flea, *Daphnia*  
482 *pulex*. *Am. Nat.* **186**, 376–389. (doi:10.1086/682277)
- 483 20. Anderson CE, Malek MC, Jonas-Closs RA, Cho Y, Peshkin L, Kirschner MW, Yampolsky LY.  
484 2022 Inverse Lansing effect: maternal age and provisioning affecting daughters' longevity  
485 and male offspring production. *Am. Nat.* (doi:10.1086/721148)
- 486 21. Lee J-H, Seo W, Lee S-H, Lee H-Y, Min K-J. 2019 Strain-specific effects of parental age on  
487 offspring in *Drosophila melanogaster*. *Entomol. Res.* **49**, 187–202. (doi:10.1111/1748-  
488 5967.12344)
- 489 22. Priest NK, Mackowiak B, Promislow DEL. 2002 The role of parental age effects on the  
490 evolution of aging. *Evolution* **56**, 927–935. (doi:10.1111/j.0014-3820.2002.tb01405.x)
- 491 23. Mousseau TA. 1991 Geographic variation in maternal-age effects on diapause in a cricket.  
492 *Evolution* **45**, 1053–1059. (doi:10.2307/2409710)
- 493 24. Gribble KE, Snell TW. 2018 Chapter 36 - Rotifers as a Model for the Biology of Aging. In  
494 *Conn's Handbook of Models for Human Aging (Second Edition)* (eds JL Ram, PM Conn), pp.  
495 483–495. Academic Press. (doi:10.1016/B978-0-12-811353-0.00036-1)
- 496 25. Gribble KE. 2021 *Brachionus* rotifers as a model for investigating dietary and metabolic  
497 regulators of aging. *Nutr. Healthy Aging* **6**, 1–15. (doi:10.3233/NHA-200104)
- 498 26. Gilbert JJ. 2007 Induction of mictic females in the rotifer *Brachionus*: oocytes of amictic  
499 females respond individually to population-density signal only during oogenesis shortly  
500 before oviposition. *Freshw. Biol.* **52**, 1417–1426. (doi:10.1111/j.1365-2427.2007.01782.x)

## Intraspecific variability in maternal age effects

- 501 27. Gilbert JJ. 1966 Rotifer ecology and embryological induction. *Science* **151**, 1234–1237.  
502 (doi:10.1126/science.151.3715.1234)
- 503 28. Gilbert JJ, McPeck MA. 2013 Maternal age and spine development in a rotifer: ecological  
504 implications and evolution. *Ecology* **94**, 2166–2172. (doi:10.1890/13-0768.1)
- 505 29. Gribble KE, Jarvis G, Bock M, Mark Welch DB. 2014 Maternal caloric restriction partially  
506 rescues the deleterious effects of advanced maternal age on offspring. *Aging Cell* **13**, 623–  
507 630. (doi:10.1111/accel.12217)
- 508 30. Gribble KE, Moran BM, Jones S, Corey EL, Welch DBM. 2018 Congeneric variability in  
509 lifespan extension and onset of senescence suggest active regulation of aging in response to  
510 low temperature. *Exp. Gerontol.* **114**, 99–106. (doi:10.1016/j.exger.2018.10.023)
- 511 31. Gribble KE, Kaido O, Jarvis G, Mark Welch DB. 2014 Patterns of intraspecific variability in the  
512 response to caloric restriction. *Exp. Gerontol.* **51**, 28–37. (doi:10.1016/j.exger.2013.12.005)
- 513 32. Mills S, Lunt DH, Gómez A. 2007 Global isolation by distance despite strong regional  
514 phylogeography in a small metazoan. *BMC Evol. Biol.* **7**, 225. (doi:10.1186/1471-2148-7-  
515 225)
- 516 33. Gómez A, Serra M, Carvalho GR, Lunt DH. 2002 Speciation in ancient cryptic species  
517 complexes: evidence from the molecular phylogeny of *Brachionus plicatilis* (Rotifera).  
518 *Evolution* **56**, 1431–1444. (doi:10.1111/j.0014-3820.2002.tb01455.x)
- 519 34. Guillard RRL. 1975 Culture of Phytoplankton for Feeding Marine Invertebrates. In *Culture of*  
520 *Marine Invertebrate Animals: Proceedings — 1st Conference on Culture of Marine*  
521 *Invertebrate Animals Greenport* (eds WL Smith, MH Chanley), pp. 29–60. Boston, MA:  
522 Springer US. (doi:10.1007/978-1-4615-8714-9\_3)
- 523 35. R Core Team. 2020 *R: A Language and Environment for Statistical Computing*. Vienna,  
524 Austria: R Foundation for Statistical Computing. See <https://www.R-project.org/>.
- 525 36. Therneau T. 2023 *A Package for Survival Analysis in R*. See [https://CRAN.R-](https://CRAN.R-project.org/package=survival)  
526 [project.org/package=survival](https://CRAN.R-project.org/package=survival).
- 527 37. Kassambara A, Kosinski M, Biecek P. 2017 *Drawing Survival Curves using 'ggplot2'*. See  
528 <https://rpkgs.datanovia.com/survminer/index.html>.
- 529 38. Cohen AA, Coste CFD, Li X-Y, Bourg S, Pavard S. 2020 Are trade-offs really the key drivers of  
530 ageing and life span? *Funct. Ecol.* **34**, 153–166. (doi:10.1111/1365-2435.13444)
- 531 39. Barker DJ. 1992 The fetal origins of diseases of old age. *Eur. J. Clin. Nutr.* **46 Suppl 3**, S3-9.
- 532



## Intraspecific variability in maternal age effects

533 **Figures**

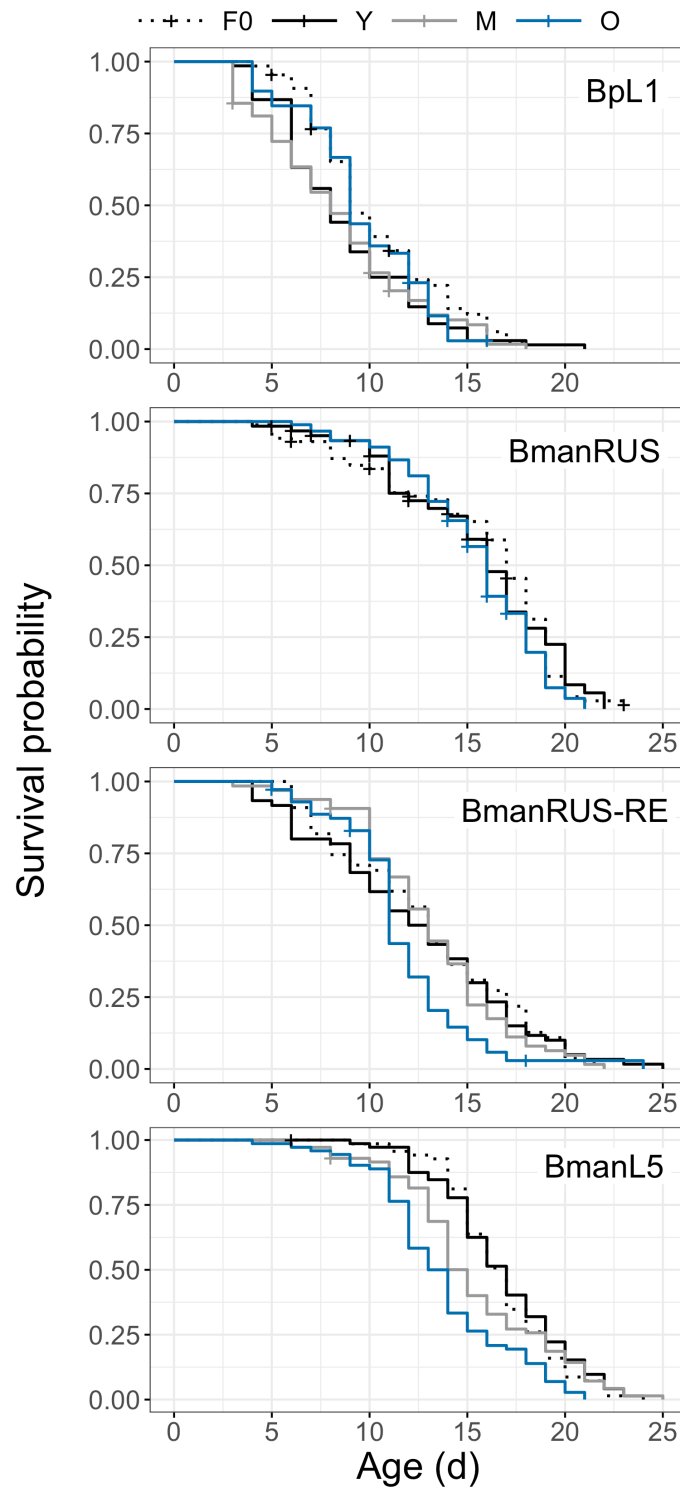

534

535 **Figure 1.** Survivorship curves of the F0 generation (dashed lines) and of the F1 generation from  
536 young (Y; black), middle-aged (M; gray), and old (O; blue) mothers, for four *Brachionus* strains.

## Intraspecific variability in maternal age effects

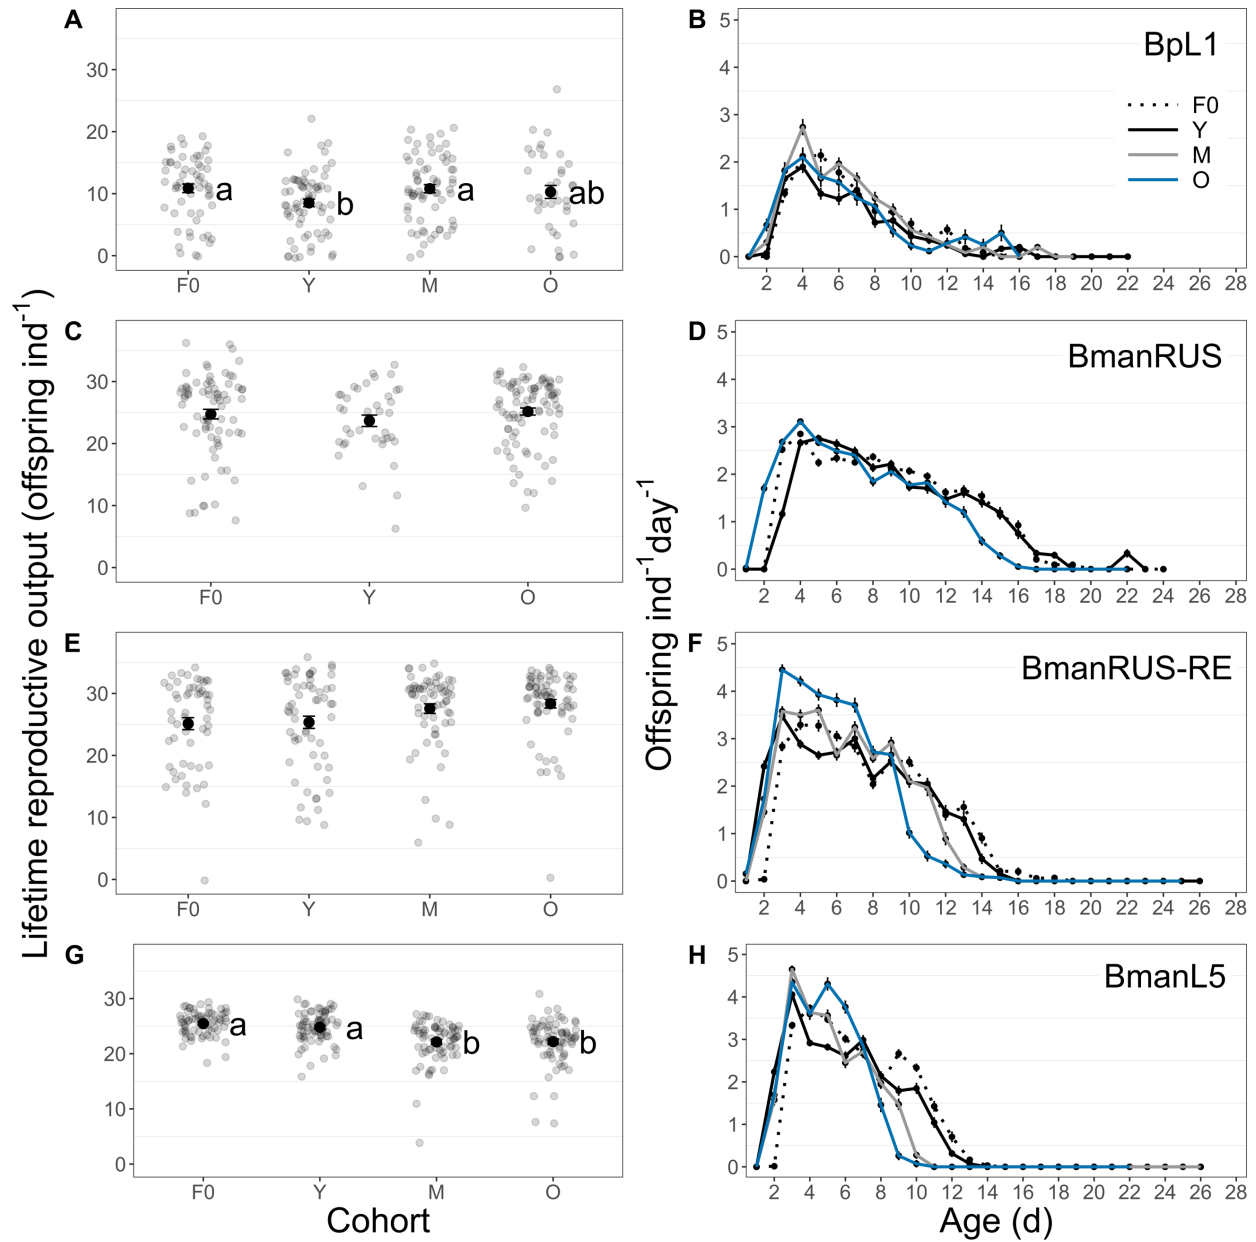

537

538 **Figure 2.** Lifetime reproductive output (LRO; A, C, E, G) and offspring produced per mother per  
 539 day throughout the lifespan (B, D, F, H), for the BpL1 (A, B), BmanRUS (C, D), BmanRUS-RE (E, F),  
 540 and BmanL5 (G, H) strains. Mean LRO for the F0 generation and young (Y), middle-aged (M),  
 541 and old (O) mother cohorts of the F1 generation is shown by bold, black points and individual  
 542 data points are shown in gray. Significant differences among cohorts are indicated by letters to  
 543 the right of the mean points (Wilcoxon rank sum tests, alpha = 0.05). Mean offspring  
 544 production per mother per day is shown by bold points ( $\pm$  SE), and cohorts are indicated by line  
 545 color (F0 - dashed, Y- black, M - gray, O - blue).

### Intraspecific variability in maternal age effects

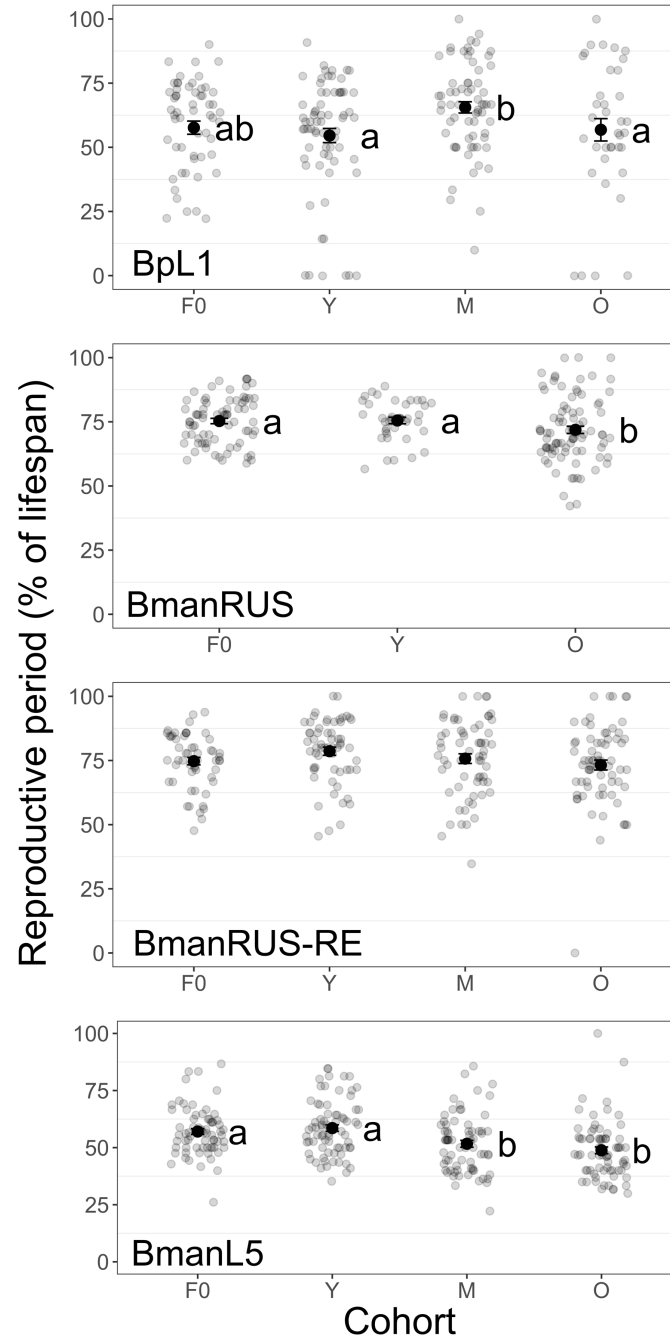

546

547 **Figure 3.** Reproductive period (percent of the lifespan spent carrying eggs) of the F0 generation  
548 and young (Y), middle-aged (M), and old (O) mother cohorts of the F1 generation, for four  
549 *Brachionus* strains. Mean reproductive periods are shown by bold, black points ( $\pm$  SE) and  
550 individual data points are shown in gray. Significant differences among cohorts are indicated by  
551 letters to the right of the mean points (Wilcoxon rank sum tests, alpha = 0.05).

552

## Intraspecific variability in maternal age effects

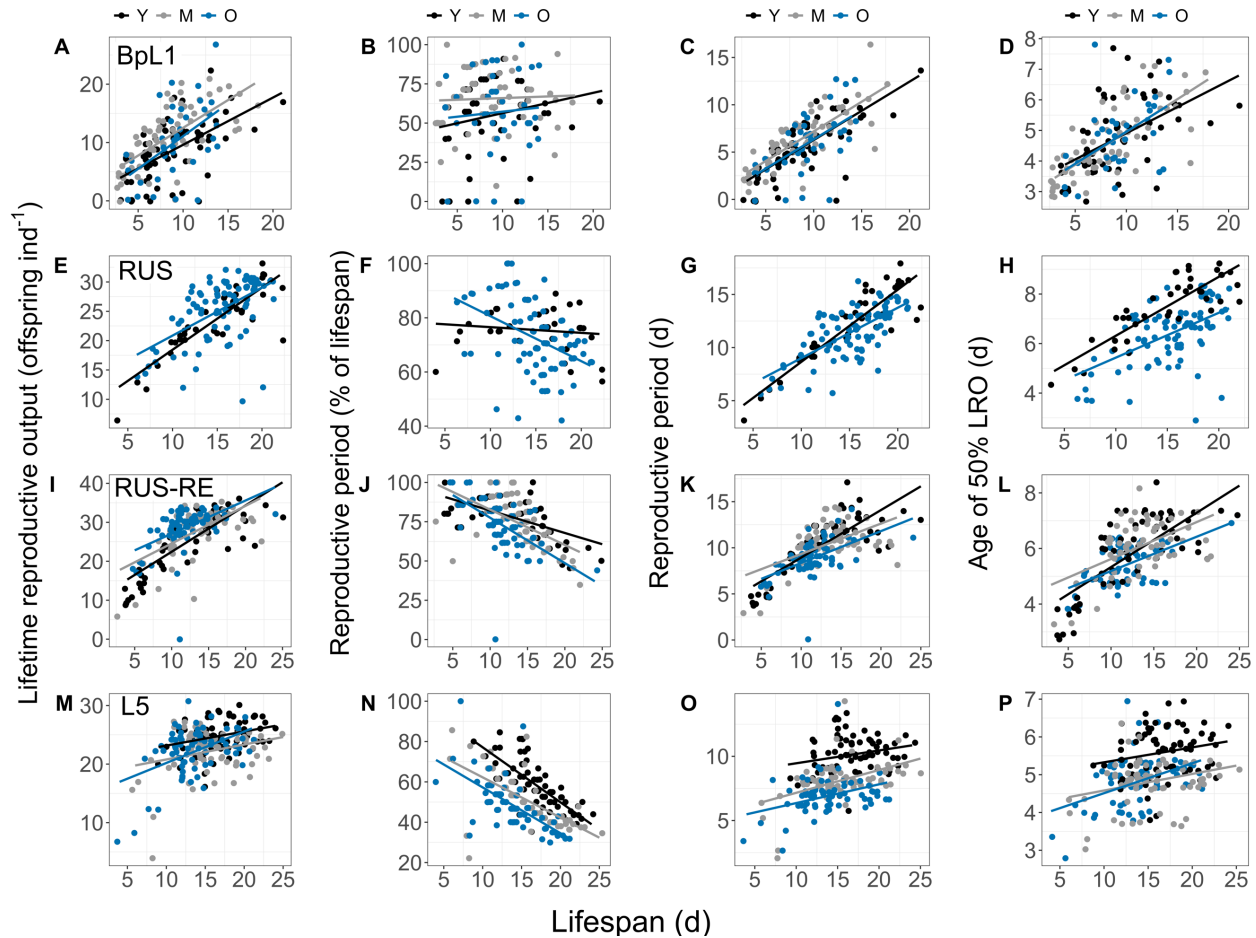

553  
554

555 **Figure 4.** Relationships between lifespan and lifetime reproductive output (LRO; A, E, I, M),  
556 reproductive period (as a percent of the lifespan; B, F, J, N), reproductive period in days (C, G, K,  
557 O), and age of 50% LRO (D, H, L, P) for the BpL1 (A-D), BmanRUS (E-H), BmanRUS-RE (I-L), and  
558 BmanL5 (M-P) strains. Young (Y), middle-aged (M), and old (O) mother cohorts are indicated  
559 within each strain by black, gray, and blue, respectively. Note differences between strains in  
560 scales of y-axes.

561

### 562 **Supplementary Materials**

563

564 **Table S1.** Summary statistics for lifespan and reproduction response metrics. Different color  
565 cells (white, gray and blue) indicates statistically significant differences among maternal age  
566 cohorts within strains. An intermediate shade (light grey) indicates that the cohort is equal to  
567 both the white and gray cohorts, which are distinct from each other. Statistical analyses were  
568 not conducted for all white columns. (separate Excel file)

569

## Intraspecific variability in maternal age effects

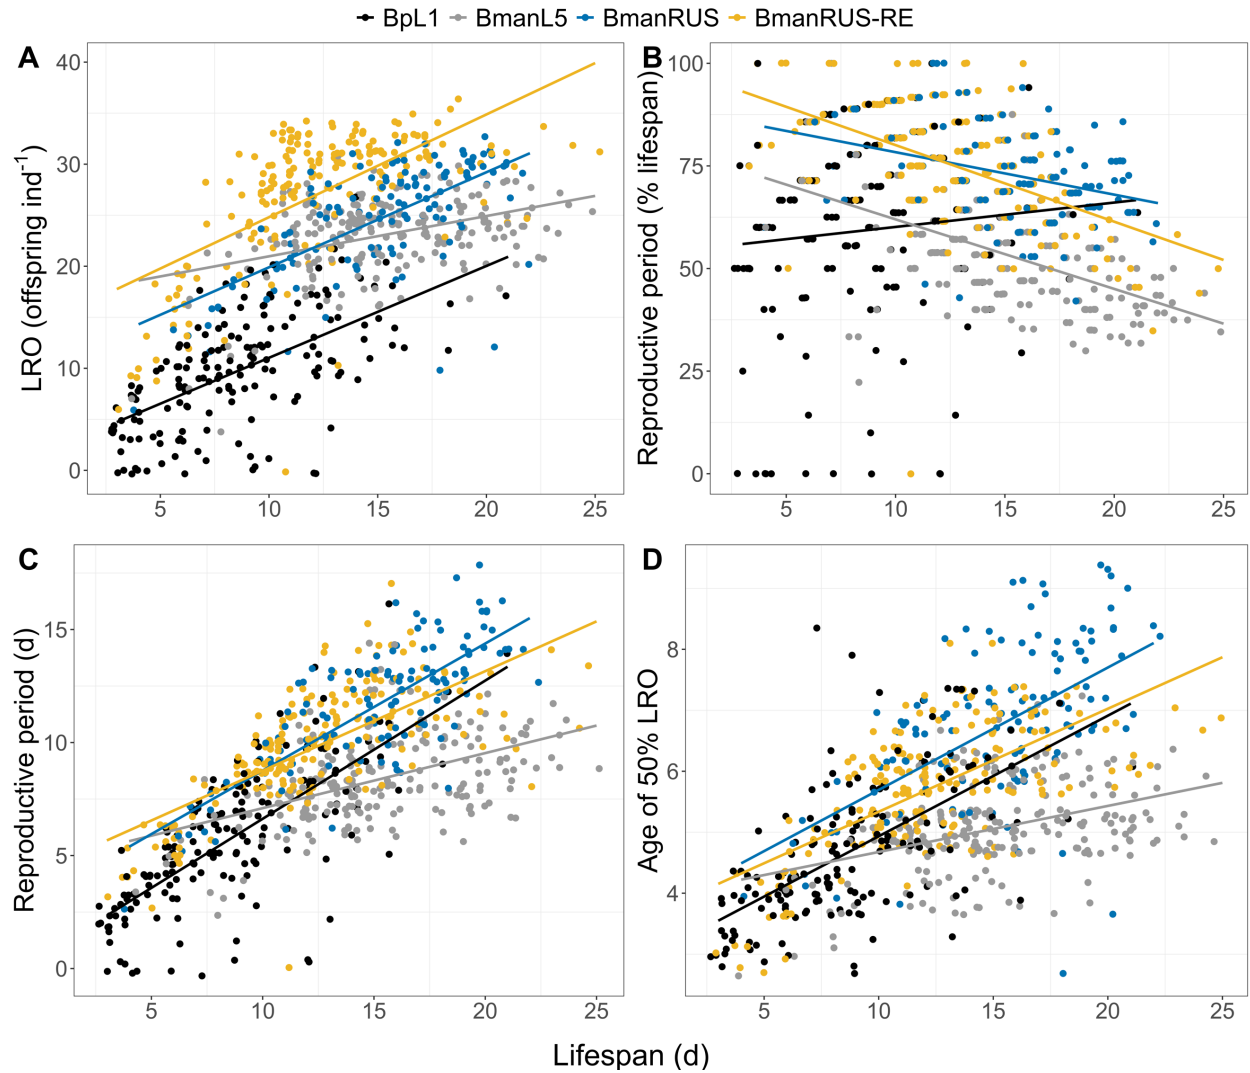

570

571

572 **Figure S1.** Relationships between lifespan and lifetime reproductive output (LRO; A),  
573 reproductive period (as a percent of the lifespan; B), reproductive period in days (C), and age of  
574 50% LRO (D) for the BpL1 (black), BmanL5 (gray), BmanRUS (blue), BmanRUS-RE (goldenrod)  
575 strains. Different maternal age cohorts are pooled within each strain here.
